# Supplementary material for: Metal–Organic Framework-Capped Gold Nanorod Hybrids for Combinatorial Cancer Therapy
Source: MDPI journal article supplement (doi:10.3390/molecules29102384), 2024-05-18
Supplement: s1 [file s1]

# Metal-Organic Framework-Capped Gold Nanorod Hybrids for Combinatorial Cancer Therapy

Chong Zhao <sup>1,†</sup>, Hongxiang Liu <sup>1,†</sup>, Sijun Huang <sup>1</sup>, Yi Guo <sup>1,\*</sup> and Li Xu <sup>1,\*</sup>

<sup>1</sup> Key laboratory for Molecular Enzymology and Engineering, the Ministry of Education, National Engineering Laboratory for AIDS Vaccine, School of Life Sciences, Jilin University, Changchun 130012, China; [zhaochong23@mails.jlu.edu.cn](mailto:zhaochong23@mails.jlu.edu.cn) (C.Z.); [hxliu15@mails.jlu.edu.cn](mailto:hxliu15@mails.jlu.edu.cn) (H.L.); [huangsj17@mails.jlu.edu.cn](mailto:huangsj17@mails.jlu.edu.cn) (S.H.); [guoyi@jlu.edu.cn](mailto:guoyi@jlu.edu.cn) (Y.G.); [xuli@jlu.edu.cn](mailto:xuli@jlu.edu.cn) (L.X.)

\* Correspondence: E-mail: [guoyi@jlu.edu.cn](mailto:guoyi@jlu.edu.cn) (Y.G.); [xuli@jlu.edu.cn](mailto:xuli@jlu.edu.cn) (L.X.), Tel: 86-431-85155226 (L.X.)

<sup>†</sup> These authors contributed equally to the work.

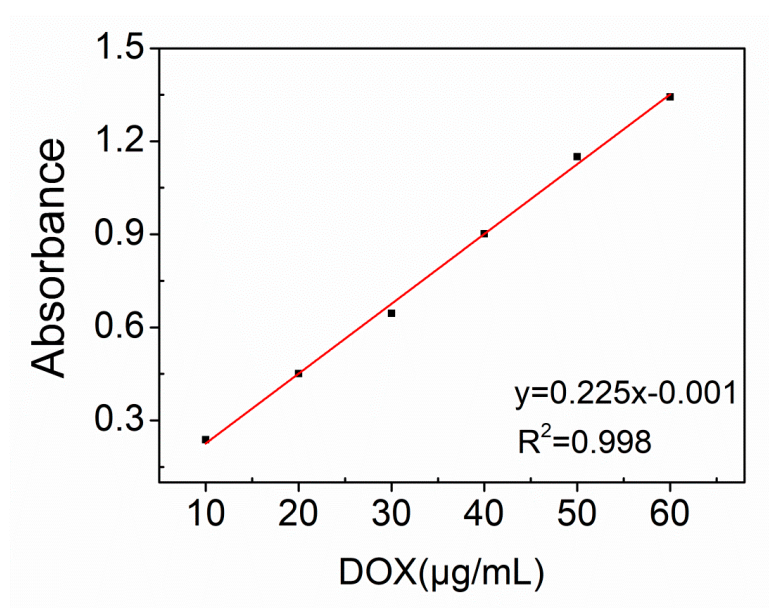

**Figure S1.** Standard curve of DOX aqueous solution.

GM and GMD alone can induce cell apoptosis by flow cytometry, and apoptosis rate can reach about 20% (Figure S2), however, when combined with near-infrared light, it can increase to more than 60%. These results prove that after exposure to light, photothermal plays a certain role in cell apoptosis.

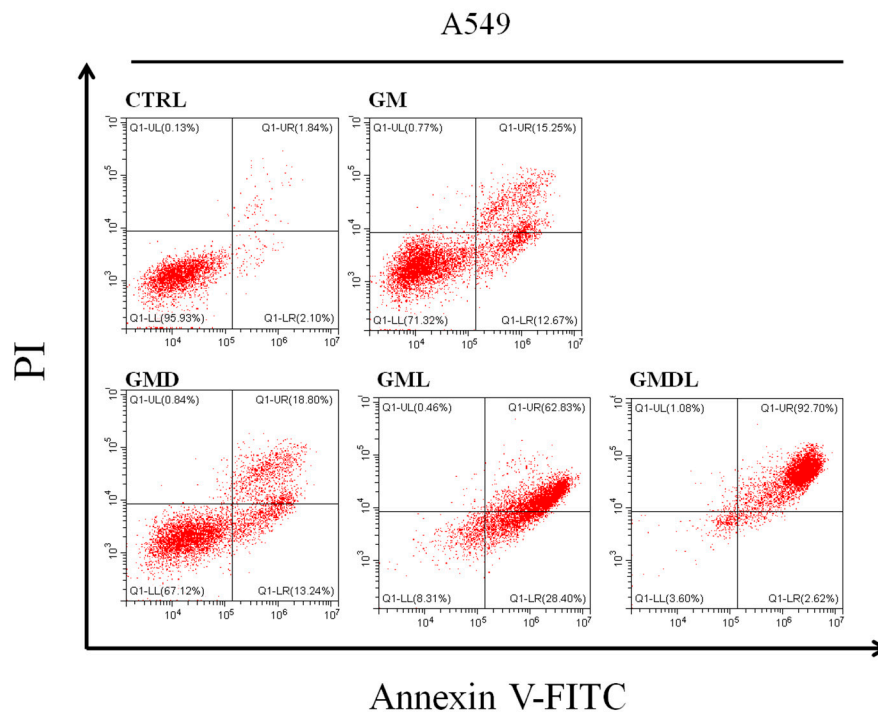

**Figure S2.** Effects of GM, GMD, GML and GMDL nanomaterials on the induction of apoptosis in A549 cells.

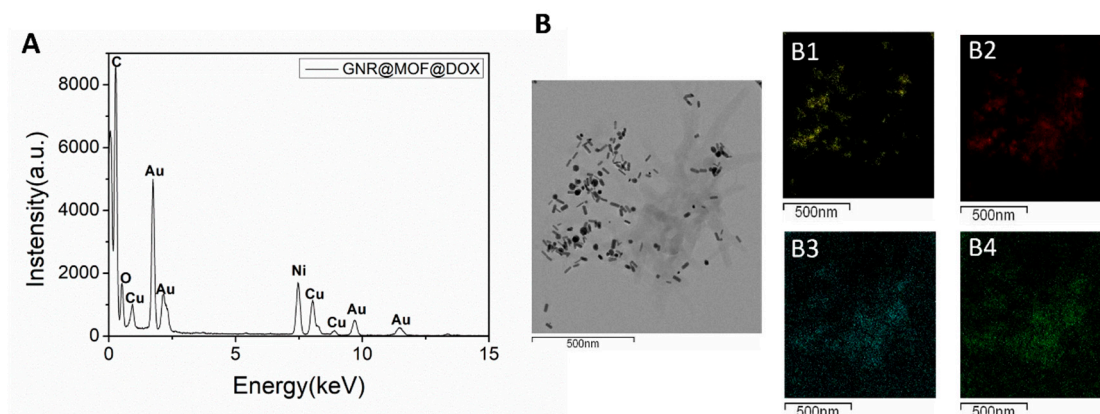

**Figure S3.** (A) EDS spectrum of GMD nanomaterials; (B) TEM image of GMD nanomaterials. STEM-EDS elemental mapping of GMD EDS analysis of GMD nanomaterials: Au (B1), Cu(B2), N(B3), O(B4).

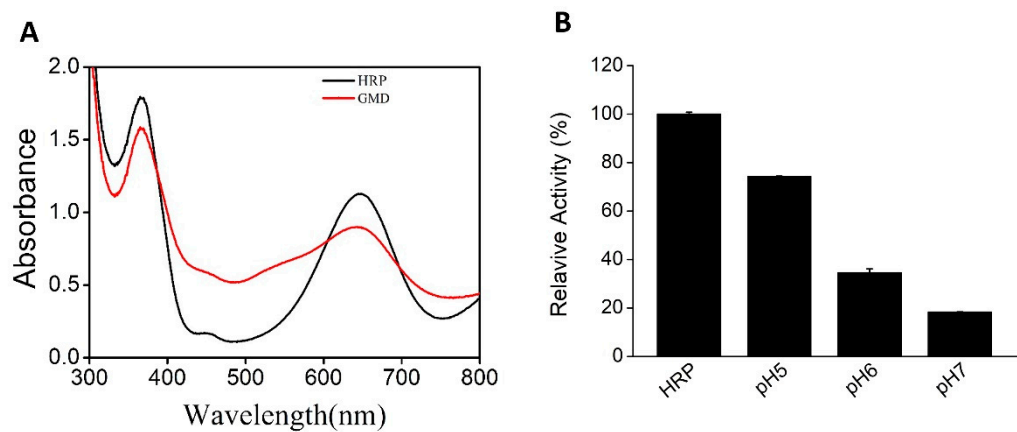

**Figure S4.** (A) UV-Vis absorption spectrum of GMD and HRP for the enzyme-like analysis in the presence of hydrogen peroxide and TMB in pH 5 and 37 °C; (B) Relative activity of pH effect on enzyme-like behavior.

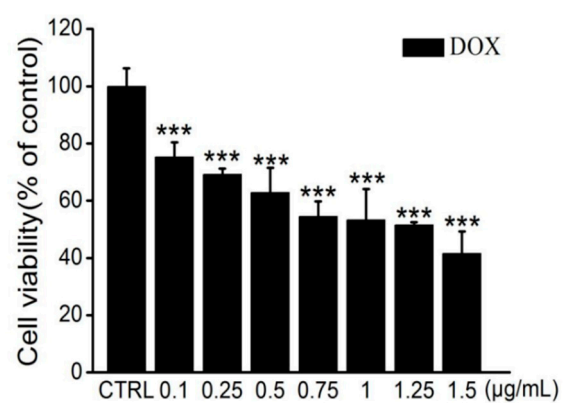

**Figure S5.** The effect of single administrations of DOX at different concentrations for 24 h on the survival rate of A549 cells. (\*\*P < 0.01 vs. control group)

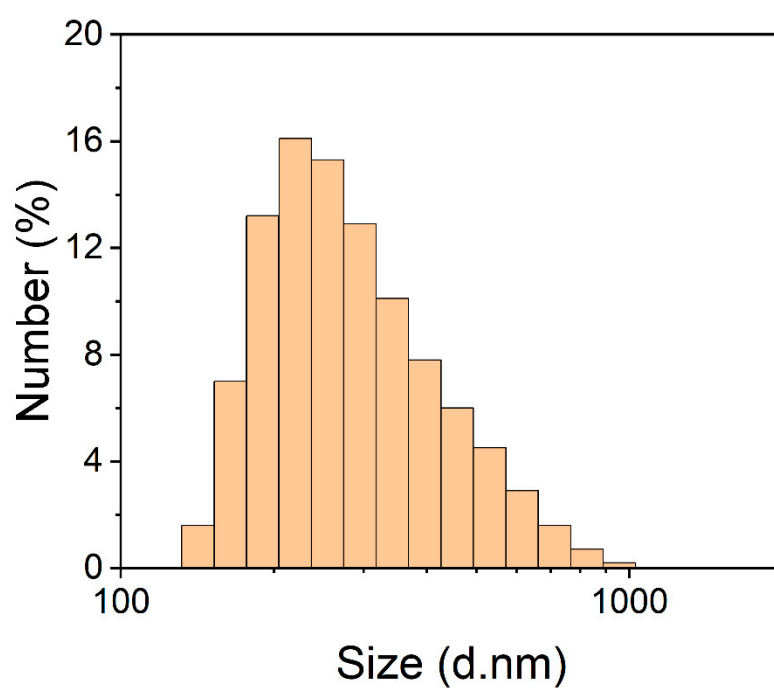

**Figure S6.** The size distribution of GMD by DLS.
